# Supplementary material for: Predicting childhood obesity using electronic health records and publicly available data
Source: PLoS One. 2019 Apr 22;14(4):e0215571. doi: 10.1371/journal.pone.0215571 (PMC6476510; doi:10.1371/journal.pone.0215571)
Supplement: S2 Table — “*” indicates a feature whose unadjusted odds ratio is significantly greater than or less than 1. (XLSX) [file pone.0215571.s005.xlsx]

## Sheet: S2 Table
Feature Name	N	Weight/Importance [95%CI]	Individual AUC	Odds Ratio [95%CI]	Adjusted Odds Ratio [95%CI]
Vital: BMI-gain0to24*	1391	0.088 [0.064, 0.112]	0.749	4.247 [3.349, 5.386]	1.092 [1.066, 1.118]
Vital: BMI-latest*	1672	0.085 [0.066, 0.104]	0.731	4.483 [3.496, 5.747]	1.089 [1.069, 1.11]
Vital: Wt-avg19to24*	1417	0.081 [0.062, 0.101]	0.749	4.067 [3.209, 5.154]	1.085 [1.064, 1.106]
Vital: Wt for Length Z-score-latest*	1665	0.045 [0.029, 0.062]	0.761	4.511 [3.503, 5.81]	1.046 [1.029, 1.064]
Vital: Wt-gain0to24*	1411	0.045 [0.03, 0.06]	0.735	3.949 [3.118, 5.001]	1.046 [1.03, 1.062]
Vital: BMI-avg19to24*	1397	0.022 [0.008, 0.036]	0.762	4.344 [3.423, 5.512]	1.022 [1.009, 1.036]
Vital: Wt for Len Percentile-latest*	1601	0.018 [0.01, 0.025]	0.751	4.255 [3.294, 5.497]	1.018 [1.01, 1.025]
Vital: BMI-avg16to19*	1293	0.018 [0.009, 0.026]	0.723	3.189 [2.527, 4.025]	1.018 [1.009, 1.026]
Vital: Wt for Len Percentile-avg16to19*	1294	0.016 [0.009, 0.023]	0.735	3.224 [2.551, 4.073]	1.016 [1.009, 1.023]
Vital: Wt for Length Z-score-avg19to24*	1392	0.015 [0.006, 0.023]	0.774	4.002 [3.155, 5.076]	1.015 [1.006, 1.023]
Vital: Wt-latest*	1677	0.015 [0.008, 0.021]	0.703	4.02 [3.127, 5.168]	1.015 [1.008, 1.021]
Vital: BMI-avg7to10*	1342	0.014 [0.006, 0.022]	0.677	2.069 [1.645, 2.602]	1.014 [1.006, 1.022]
Vital: Wt for Length Z-score-avg16to19*	1292	0.011 [0.006, 0.016]	0.718	3.143 [2.49, 3.966]	1.011 [1.006, 1.016]
Vital: Wt for Length Z-score-avg7to10*	1346	0.01 [0.003, 0.017]	0.675	2.147 [1.708, 2.7]	1.01 [1.003, 1.017]
Vital: Wt for Len Percentile-gain0to24*	1392	0.01 [0.004, 0.015]	0.753	3.861 [3.032, 4.917]	1.01 [1.004, 1.015]
Vital: Wt-avg3to5*	1344	0.009 [0.004, 0.014]	0.629	1.988 [1.58, 2.502]	1.009 [1.004, 1.015]
Maternal Delivery Age	1751	0.008 [0.004, 0.011]	0.529	1.105 [0.881, 1.385]	1.008 [1.004, 1.011]
Vital: Wt-avg16to19*	1323	0.007 [0.002, 0.012]	0.708	3.04 [2.41, 3.836]	1.007 [1.002, 1.013]
Vital: Wt for Length Z-score-avg10to13*	1403	0.006 [0.003, 0.009]	0.67	2.48 [1.97, 3.122]	1.006 [1.003, 1.01]
Vital: Wt for Length Z-score-avg13to16*	1285	0.006 [0.002, 0.01]	0.673	2.287 [1.818, 2.877]	1.006 [1.002, 1.01]
Vital: Wt for Len Percentile-avg10to13*	1404	0.006 [0.003, 0.009]	0.669	2.684 [2.131, 3.381]	1.006 [1.003, 1.009]
Vital: Wt-avg5to7*	1369	0.005 [0.001, 0.009]	0.613	2.216 [1.761, 2.787]	1.005 [1.001, 1.009]
Vital: Wt for Length Z-score-avg3to5*	1321	0.005 [0.002, 0.008]	0.639	1.681 [1.337, 2.114]	1.005 [1.002, 1.008]
Vital: Temp-latest	1676	0.004 [0.001, 0.008]	0.495	1.157 [0.921, 1.453]	1.004 [1.001, 1.008]
Vital: Ht Percentile-gain13to19	832	0.004 [0, 0.008]	0.476	1.172 [0.894, 1.536]	1.004 [1, 1.008]
Vital: Wt-gain13to19*	1448	0.004 [0.001, 0.006]	0.588	1.72 [1.369, 2.161]	1.004 [1.001, 1.006]
Vital: Wt-avg1to3*	1388	0.004 [0.001, 0.006]	0.58	1.947 [1.549, 2.448]	1.004 [1.001, 1.006]
Vital: BMI-avg10to13*	1400	0.004 [0, 0.007]	0.648	2.301 [1.83, 2.895]	1.004 [1, 1.007]
Vital: Wt for Len Percentile-avg19to24*	1398	0.003 [0, 0.006]	0.767	3.884 [3.049, 4.948]	1.003 [1, 1.006]
Vital: HR-avg3to5	273	-0.003 [-0.008, 0.003]	0.486	0.649 [0.397, 1.061]	0.997 [0.992, 1.003]
Vital: Wt Percentile-latest*	1034	0.003 [0, 0.006]	0.695	2.653 [2.104, 3.345]	1.003 [1, 1.006]
Diagnosis:9ccs256:Exam/eval	141	-0.003 [-0.008, 0.003]	0.502	0.785 [0.505, 1.221]	0.997 [0.992, 1.003]
Vital: Ht-avg7to10	1343	-0.003 [-0.007, 0.002]	0.483	1.201 [0.951, 1.517]	0.997 [0.993, 1.002]
Vital: Ht Percentile-gain10to16	760	-0.002 [-0.005, 0]	0.544	0.965 [0.731, 1.274]	0.998 [0.995, 1]
Vital: BMI-avg13to16*	1283	0.002 [-0.001, 0.006]	0.652	2.266 [1.799, 2.852]	1.002 [0.999, 1.006]
Vital: BMI-avg3to5*	1314	0.002 [0, 0.005]	0.635	1.808 [1.437, 2.274]	1.002 [1, 1.005]
Vital: Ht Percentile-gain0to24*	926	0.002 [-0.002, 0.006]	0.59	1.596 [1.246, 2.043]	1.002 [0.998, 1.006]
Vital: Wt for Length Z-score-avg5to7*	1347	0.002 [0, 0.004]	0.617	1.778 [1.414, 2.235]	1.002 [1, 1.004]
Diagnosis:9ccs96:Hrt valve dx	159	0.002 [-0.002, 0.006]	0.503	1.256 [0.863, 1.827]	1.002 [0.998, 1.006]
Vital: Wt for Length Z-score-avg1to3*	1377	0.002 [0, 0.004]	0.564	1.349 [1.074, 1.693]	1.002 [1, 1.004]
Vital: Wt-avg0to1*	1356	0.002 [0, 0.004]	0.573	1.489 [1.184, 1.873]	1.002 [1, 1.004]
Vital: Wt-gain3to7*	1487	0.002 [0, 0.004]	0.52	1.284 [1.021, 1.614]	1.002 [1, 1.004]
Diagnosis:9ccs59:Anemia	182	0.002 [-0.002, 0.005]	0.518	1.032 [0.714, 1.49]	1.002 [0.998, 1.005]
Vital: Wt for Len Percentile-avg3to5	504	-0.002 [-0.005, 0.002]	0.596	1.284 [0.941, 1.751]	0.998 [0.995, 1.002]
Vital: Wt for Len Percentile-avg5to7*	1198	0.002 [-0.001, 0.005]	0.619	2.078 [1.634, 2.643]	1.002 [0.999, 1.005]
Diagnosis:9ccs0:No DX	89	-0.002 [-0.005, 0.002]	0.506	1.408 [0.874, 2.268]	0.998 [0.995, 1.002]
Vital: Wt Change-avg5to7	425	0.002 [-0.001, 0.004]	0.493	1.11 [0.767, 1.607]	1.002 [0.999, 1.004]
Vital: Ht Percentile-avg13to16	661	-0.002 [-0.005, 0.002]	0.545	1.285 [0.973, 1.695]	0.998 [0.995, 1.002]
Vital: BMI-avg1to3*	1370	0.002 [-0.001, 0.004]	0.604	1.693 [1.347, 2.129]	1.002 [0.999, 1.004]
Vital: BMI-gain1to5	1461	-0.002 [-0.004, 0.001]	0.502	0.988 [0.787, 1.241]	0.998 [0.996, 1.001]
Vital: Wt Percentile-gain13to19	812	0.001 [-0.001, 0.003]	0.545	1.283 [0.948, 1.736]	1.001 [0.999, 1.003]
Diagnosis:9ccs125:Bronchitis	481	-0.001 [-0.004, 0.001]	0.531	0.983 [0.763, 1.267]	0.999 [0.996, 1.001]
Vital: Wt Percentile-avg16to19*	746	-0.001 [-0.004, 0.001]	0.605	2.004 [1.568, 2.561]	0.999 [0.996, 1.001]
Vital: Wt Percentile-avg10to13*	638	0.001 [-0.001, 0.004]	0.586	1.802 [1.392, 2.332]	1.001 [0.999, 1.004]
Vital: HC-avg13to16	973	0.001 [-0.001, 0.004]	0.554	1.129 [0.89, 1.433]	1.001 [0.999, 1.004]
Vital: Wt for Len Percentile-avg7to10*	1339	0.001 [0, 0.003]	0.67	2.266 [1.799, 2.853]	1.001 [1, 1.003]
Vital: Wt Percentile-gain0to3	363	0.001 [-0.001, 0.004]	0.515	1.189 [0.815, 1.732]	1.001 [0.999, 1.004]
Vital: Wt-gain1to5	1472	-0.001 [-0.002, 0]	0.522	0.993 [0.79, 1.247]	0.999 [0.998, 1]
Vital: BMI-gain7to13	1496	-0.001 [-0.002, 0]	0.48	1.138 [0.883, 1.468]	0.999 [0.998, 1]
Vital: BMI Percentile-avg19to24*	275	0.001 [-0.001, 0.003]	0.597	2.882 [2.032, 4.086]	1.001 [0.999, 1.003]
Vital: Wt Percentile-avg7to10*	536	0.001 [-0.001, 0.003]	0.544	1.504 [1.134, 1.995]	1.001 [0.999, 1.003]
Diagnosis:9ccs134:Ot uppr resp	167	-0.001 [-0.003, 0.001]	0.484	0.755 [0.5, 1.141]	0.999 [0.997, 1.001]
Vital: Ht Percentile-gain1to5	452	0.001 [-0.001, 0.003]	0.466	0.762 [0.526, 1.105]	1.001 [0.999, 1.003]
Vital: HR-avg5to7*	318	0.001 [-0.001, 0.003]	0.546	2.013 [1.408, 2.877]	1.001 [0.999, 1.003]
Vital: RR-avg10to13	258	-0.001 [-0.003, 0.001]	0.535	1.045 [0.647, 1.689]	0.999 [0.997, 1.001]
Vital: Temp-avg3to5	1345	-0.001 [-0.002, 0]	0.533	1.059 [0.839, 1.337]	0.999 [0.998, 1]
Vital: Ht-gain16to24	1442	-0.001 [-0.002, 0]	0.536	0.985 [0.7, 1.387]	0.999 [0.998, 1]
Newborn Diagnosis:9ccs224:Ot perint dx	806	-0.001 [-0.004, 0.002]	0.471	0.965 [0.769, 1.21]	0.999 [0.996, 1.002]
Number of Visits	1696	-0.001 [-0.002, 0]	0.444	0.956 [0.759, 1.205]	0.999 [0.998, 1]
Vital: Wt for Len Percentile-gain3to7*	1184	0.001 [-0.001, 0.002]	0.532	1.549 [1.223, 1.962]	1.001 [0.999, 1.002]
Vital: RR-avg1to3	165	-0.001 [-0.002, 0.001]	0.47	1.209 [0.727, 2.01]	0.999 [0.998, 1.001]
Newborn Diagnosis:9ccs259:Unclassified	71	0.001 [-0.001, 0.002]	0.505	1.211 [0.701, 2.093]	1.001 [0.999, 1.002]
Vital: Temp-avg10to13	1421	0.001 [-0.001, 0.002]	0.495	1.209 [0.963, 1.519]	1.001 [0.999, 1.002]
Vital: Wt for Len Percentile-avg13to16*	1286	0.001 [-0.001, 0.002]	0.666	2.171 [1.726, 2.731]	1.001 [0.999, 1.002]
Vital: Ht Percentile-gain5to10	590	-0.001 [-0.002, 0]	0.501	0.909 [0.659, 1.253]	0.999 [0.998, 1]
Vital: BMI-gain0to3*	1416	-0.001 [-0.002, 0.001]	0.549	1.282 [1.019, 1.613]	0.999 [0.998, 1.001]
Vital: Wt for Length Z-score-gain16to24*	1463	0.001 [0, 0.001]	0.594	1.409 [1.123, 1.768]	1.001 [1, 1.001]
Vital: HC-gain0to3	1344	-0.001 [-0.002, 0.001]	0.517	1.162 [0.915, 1.474]	0.999 [0.998, 1.001]
Vital: Wt Change-avg3to5	370	0.001 [-0.001, 0.002]	0.549	0.972 [0.656, 1.439]	1.001 [0.999, 1.002]
Vital: Ht Percentile-avg0to1	309	0.001 [-0.001, 0.002]	0.507	1.145 [0.783, 1.674]	1.001 [0.999, 1.002]
Vital: Wt Change-avg16to19*	716	0.001 [-0.001, 0.002]	0.529	1.806 [1.349, 2.418]	1.001 [0.999, 1.002]
Vital: Wt Change-latest*	987	-0.001 [-0.002, 0.001]	0.584	1.43 [1.09, 1.874]	0.999 [0.998, 1.001]
Vital: BMI Percentile-latest*	247	0.001 [0, 0.001]	0.572	2.918 [2.034, 4.185]	1.001 [1, 1.001]
Vital: Wt-gain0to3*	1425	0.001 [0, 0.001]	0.534	1.462 [1.162, 1.839]	1.001 [1, 1.001]
Vital: BMI-gain13to19*	1462	0.001 [0, 0.002]	0.583	1.439 [1.146, 1.808]	1.001 [1, 1.002]
Vital: Wt for Len Percentile-gain10to16	1330	0 [-0.001, 0]	0.496	1.141 [0.909, 1.433]	1 [0.999, 1]
Diagnosis:9ccs239:Superfic inj	165	0 [-0.001, 0]	0.506	0.91 [0.613, 1.351]	1 [0.999, 1]
Vital: HC-gain16to24	1079	0 [0, 0.001]	0.511	1.219 [0.956, 1.555]	1 [1, 1.001]
Vital: Wt Change-avg7to10	504	0 [-0.002, 0.001]	0.505	0.896 [0.6, 1.337]	1 [0.998, 1.001]
Diagnosis:9ccs257:Ot aftercare	783	0 [0, 0.001]	0.459	0.992 [0.79, 1.245]	1 [1, 1.001]
Diagnosis:9ccs74:Ot mentl cnd	204	0 [-0.001, 0]	0.494	0.817 [0.565, 1.182]	1 [0.999, 1]
Vital: BMI Percentile-gain16to24*	235	0 [0, 0.001]	0.576	2.838 [1.958, 4.112]	1 [1, 1.001]
Diagnosis:9ccs136:Teeth dx	128	0 [0, 0.001]	0.502	1.484 [0.995, 2.214]	1 [1, 1.001]
Vital: Wt-gain10to16	1466	0 [-0.001, 0]	0.519	0.865 [0.679, 1.104]	1 [0.999, 1]
Vital: Wt Percentile-gain0to24*	914	0 [0, 0.001]	0.673	2.491 [1.969, 3.15]	1 [1, 1.001]
Vital: Wt for Len Percentile-gain16to24	1353	0 [0, 0.001]	0.487	0.799 [0.624, 1.024]	1 [1, 1.001]
Vital: HC-gain13to19	1054	0 [0, 0.001]	0.498	1.081 [0.862, 1.357]	1 [1, 1.001]
Vital: HR-avg1to3	265	0 [-0.001, 0]	0.499	0.901 [0.585, 1.388]	1 [0.999, 1]
Vital: Ht-gain0to3	1419	0 [-0.001, 0]	0.506	1.156 [0.909, 1.469]	1 [0.999, 1]
Diagnosis:9ccs58:Ot nutrit dx*	162	0 [0, 0.001]	0.516	1.954 [1.381, 2.764]	1 [1, 1.001]
Vital: Ht Percentile-gain7to13*	690	0 [0, 0.001]	0.576	1.479 [1.11, 1.972]	1 [1, 1.001]
Vital: Wt for Length Z-score-gain1to5	1421	0 [0, 0.001]	0.481	1.022 [0.812, 1.287]	1 [1, 1.001]
Vital: Wt for Length Z-score-avg0to1	1343	0 [0, 0.001]	0.554	1.177 [0.935, 1.48]	1 [1, 1.001]
Vital: HC-avg7to10*	1119	0 [0, 0.001]	0.563	1.386 [1.102, 1.744]	1 [1, 1.001]
Vital: Wt Percentile-gain3to7	491	0 [0, 0.001]	0.536	1.157 [0.795, 1.685]	1 [1, 1.001]
Vital: Wt-avg13to16*	1316	0 [-0.001, 0.001]	0.668	2.403 [1.908, 3.025]	1 [0.999, 1.001]
Vital: Wt-gain7to13*	1496	0 [-0.001, 0]	0.561	1.701 [1.338, 2.162]	1 [0.999, 1]
Vital: Wt-avg7to10*	1374	0 [0, 0.001]	0.618	2.112 [1.68, 2.657]	1 [1, 1.001]
Vital: BMI-gain5to10	1471	0 [0, 0.001]	0.581	1.143 [0.91, 1.435]	1 [1, 1.001]
Vital: Ht-gain7to13	1476	0 [0, 0]	0.536	1.168 [0.864, 1.58]	1 [1, 1]
Vital: Wt Change-avg0to1	225	0 [-0.001, 0]	0.49	0.845 [0.517, 1.38]	1 [0.999, 1]
Vital: HC-avg19to24*	933	0 [0, 0.001]	0.601	1.593 [1.247, 2.034]	1 [1, 1.001]
Newborn Diagnosis:9ccs10:Immuniz/scrn	1654	0 [-0.001, 0]	0.494	0.852 [0.53, 1.371]	1 [0.999, 1]
Vital: BMI-gain10to16	1482	0 [-0.001, 0]	0.499	0.877 [0.692, 1.111]	1 [0.999, 1]
Vital: Wt for Length Z-score-gain13to19	1485	0 [0, 0]	0.507	1.109 [0.884, 1.392]	1 [1, 1]
Vital: Wt Percentile-gain10to16	742	0 [0, 0]	0.486	0.895 [0.668, 1.2]	1 [1, 1]
Vital: Wt for Len Percentile-gain7to13	1336	0 [0, 0]	0.502	1.084 [0.859, 1.369]	1 [1, 1]
Vital: HC-avg1to3*	1235	0 [0, 0]	0.544	1.366 [1.082, 1.723]	1 [1, 1]
Vital: Wt-gain5to10	1472	0 [0, 0]	0.577	1.156 [0.922, 1.45]	1 [1, 1]
Vital: Ht-avg0to1*	1350	0 [0, 0]	0.574	1.413 [1.125, 1.774]	1 [1, 1]
Vital: Ht-latest*	1665	0 [0, 0]	0.555	1.383 [1.078, 1.773]	1 [1, 1]
Vital: Wt Percentile-gain1to5*	424	0 [0, 0]	0.467	0.622 [0.403, 0.96]	1 [1, 1]
Vital: Ht Percentile-gain16to24	975	0 [0, 0]	0.549	1.147 [0.882, 1.492]	1 [1, 1]
Vital: Wt Percentile-gain5to10	574	0 [0, 0]	0.524	0.822 [0.563, 1.199]	1 [1, 1]
Vital: Wt for Length Z-score-gain5to10	1486	0 [0, 0]	0.52	1.088 [0.866, 1.367]	1 [1, 1]
Vital: Ht Percentile-gain3to7	514	0 [0, 0]	0.509	0.967 [0.692, 1.353]	1 [1, 1]
Vital: HC-gain1to5	1371	0 [-0.002, 0.002]	0.445	0.891 [0.704, 1.127]	1 [0.998, 1.002]
Vital: Wt Percentile-avg5to7*	462	0 [0, 0]	0.533	1.576 [1.167, 2.127]	1 [1, 1]
Vital: Wt Change-avg19to24*	879	0 [0, 0]	0.563	1.673 [1.252, 2.235]	1 [1, 1]
Vital: BMI-avg5to7*	1341	0 [0, 0]	0.633	1.832 [1.456, 2.305]	1 [1, 1]
Vital: Ht-avg1to3*	1374	0 [0, 0]	0.528	1.477 [1.174, 1.858]	1 [1, 1]
Vital: BMI-avg0to1*	1349	0 [0, 0]	0.584	1.526 [1.213, 1.918]	1 [1, 1]
Vital: Ht-gain10to16	1442	0 [0, 0]	0.499	0.837 [0.658, 1.064]	1 [1, 1]
Vital: Wt for Len Percentile-gain5to10	1318	0 [-0.001, 0.001]	0.558	0.982 [0.778, 1.24]	1 [0.999, 1.001]
Vital: Wt for Length Z-score-gain10to16	1500	0 [0, 0]	0.515	1.181 [0.941, 1.483]	1 [1, 1]
Diagnosis:9ccs10:Immuniz/scrn	1428	0 [0, 0]	0.455	0.961 [0.72, 1.284]	1 [1, 1]
Diagnosis:9ccs135:Intest infct	470	0 [0, 0]	0.503	1.188 [0.925, 1.525]	1 [1, 1]
Vital: Wt Change-avg1to3	316	0 [0, 0]	0.475	0.819 [0.534, 1.257]	1 [1, 1]
Vital: BMI-gain3to7	1478	0 [0, 0]	0.547	1.13 [0.893, 1.43]	1 [1, 1]
Vital: HR-avg0to1	196	0 [0, 0]	0.497	1.544 [0.961, 2.479]	1 [1, 1]
Vital: Wt Percentile-gain16to24	963	0 [0, 0]	0.55	0.991 [0.728, 1.347]	1 [1, 1]
Vital: BMI-gain16to24	1484	0 [0, 0]	0.547	1.317 [0.995, 1.744]	1 [1, 1]
Vital: Wt for Length Z-score-gain0to24*	1665	0 [0, 0]	0.761	4.511 [3.503, 5.81]	1 [1, 1]
Vital: Wt for Length Z-score-gain0to3	1343	0 [0, 0]	0.554	1.177 [0.935, 1.48]	1 [1, 1]
